# Supplementary material for: K5Eu(MoO4)4 red phosphor for solid state lighting applications, prepared by different techniques
Source: Royal Society of Chemistry journal article supplement (doi:10.1039/d2ce01107g), 2023-01-01
Supplement: d2ce01107g2.pdf [file d2ce01107g2.pdf]

Supplementary Information for

**K<sub>5</sub>Eu(MoO<sub>4</sub>)<sub>4</sub> red phosphor for solid state lighting applications, prepared  
by different techniques**

Svetlana M. Posokhova, Vladimir A. Morozov, Dina V. Deyneko, Boris S. Redkin,  
Dmitry A. Spassky, Vitali Nagirnyi, Alexei A. Belik, Joke Hadermann, Erzhen T. Pavlova,  
Bogdan I. Lazoryak

**Table S1.** EDX analysis results of K<sub>5</sub>Eu(MoO<sub>4</sub>)<sub>4</sub> prepared by different techniques.

| Preparation | Solid-state<br>synthesis | Sol-gel method<br>followed by annealing at 893 K | Czochralski<br>technique |
|-------------|--------------------------|--------------------------------------------------|--------------------------|
| K, at. %    | 50.23±3.20               | 48.63±3.25                                       | 47.79±1.86               |
| Mo, at. %   | 39.34±2.17               | 41.55±2.81                                       | 42.54±2.13               |
| Eu, at. %   | 10.43±1.25               | 9.82±1.60                                        | 9.67±0.56                |

**Table S2.** Unit cell parameters and estimated crystallite size for K<sub>5</sub>Eu(MoO<sub>4</sub>)<sub>4</sub> prepared by solid state synthesis (*ss*), sol-gel method followed by annealing at 893 K (*sg893*) and the Czochralski (*CZ*) techniques (SG  $R\bar{3}m$ ) and reference data.

| Technique       | <i>a</i> , Å | <i>c</i> , Å | <i>V</i> , Å <sup>3</sup> | Crystallite size (nm) |
|-----------------|--------------|--------------|---------------------------|-----------------------|
| <i>sg893</i>    | 5.9730(1)    | 20.6674(7)   | 638.55(2)                 | 97±14                 |
| <i>ss</i>       | 5.9758(1)    | 20.7091(6)   | 640.46(1)                 | 94±11                 |
| <i>CZ</i>       | 5.9818(3)    | 20.699(1)    | 641.42(6)                 |                       |
| PDF-2, №45–0340 | 5.980        | 20.74        | 642.53                    |                       |

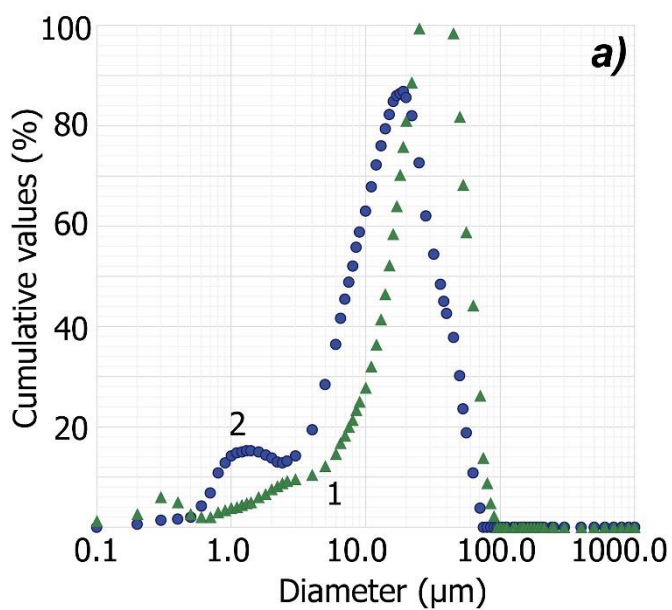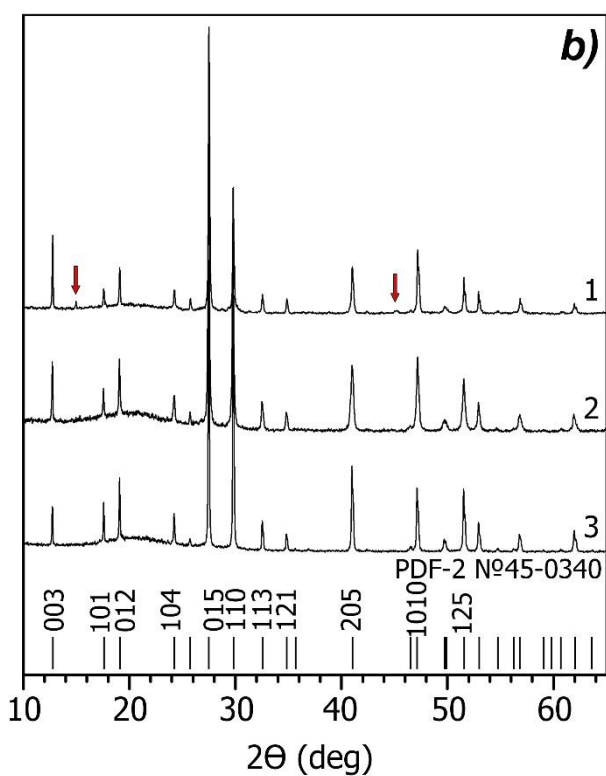

**Fig. S1.** Particle size distributions (a) and PXRD patterns (b) of  $K_5Eu(MoO_4)_4$  synthesized by various methods: *sg893*-KEMO (1), *ss*-KEMO (2) and crushed crystal (3). Tick marks denote the peak positions of Bragg reflections for  $K_5Eu(MoO_4)_4$  from ICDD Data Base (JCPDS, PDF-2, №45–0340). The *hkl* indexes for strong reflections are listed. Low intensities reflections of  $K_2Mo_2O_7$  phase (PDF#2 Card no. 36-0347) in the PXRD pattern of *sg893*-KEMO are shown by red arrows.

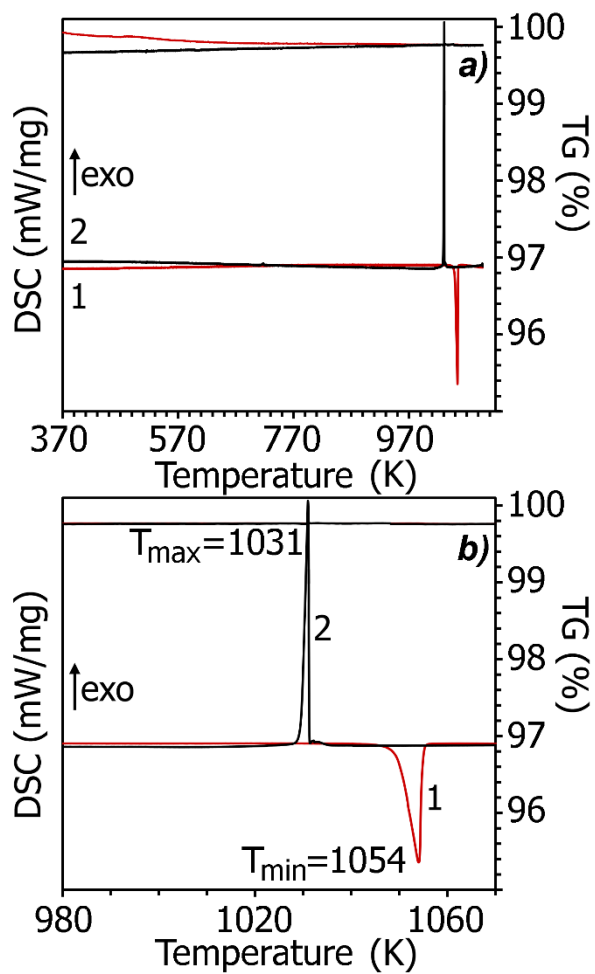

**Fig. S2.** Fragments of DSC and TG curves for ss-KEMO sample in the temperature ranges of 370-1120 K (a) and 980-1070 K (b) in heating (1) and cooling (2) cycle, successively.

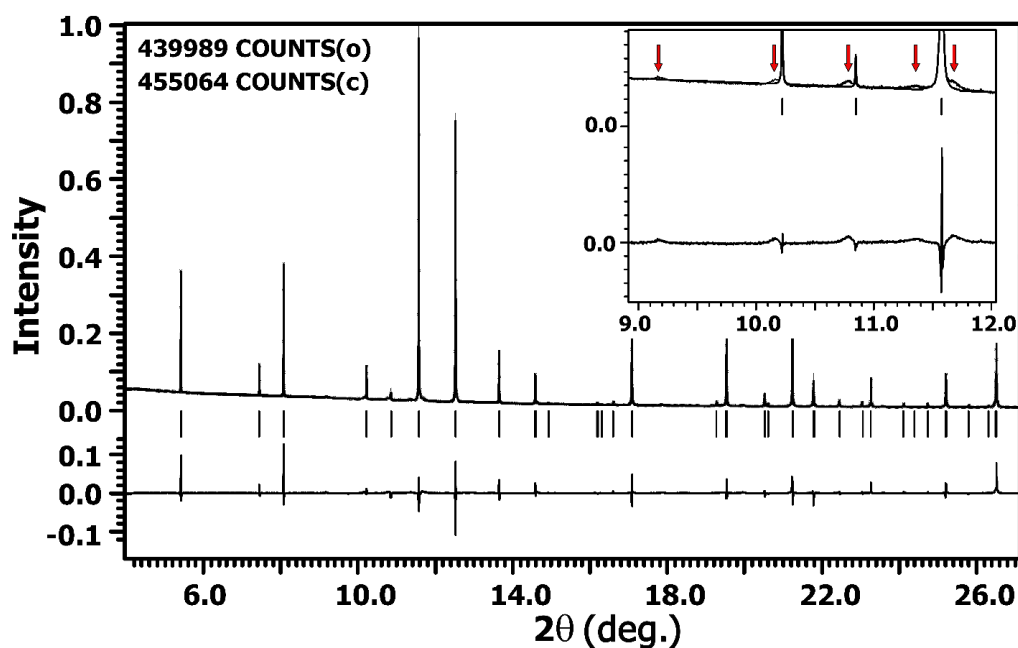

**Figure S3.** Fragments of the experimental, calculated and difference synchrotron XPD patterns for  $\text{K}_5\text{Eu}(\text{MoO}_4)_4$  structure in the  $R\bar{3}m$  model. Tick marks denote the peak positions of possible Bragg reflections. Inset shows the one of the parts of the profile with extra broad reflections shown by red arrows.

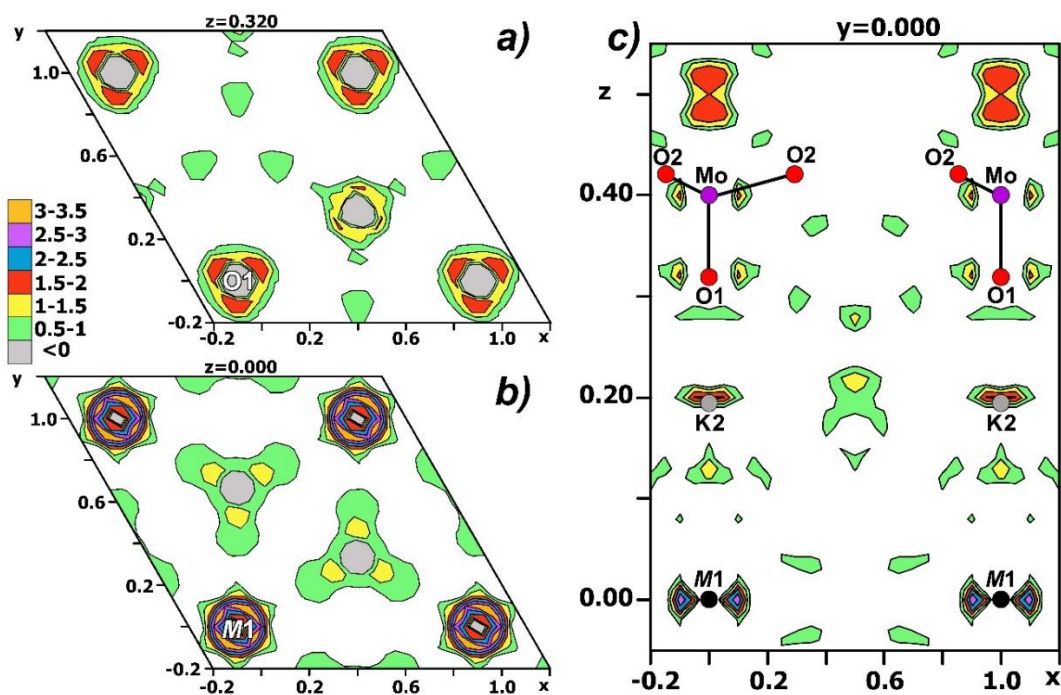

**Figure S4.**  $[\rho_{dif}: (x; y; z)]$  residual electron density maps for  $\text{K}_5\text{Eu}(\text{MoO}_4)_4$  structure after the refinement in the  $R\bar{3}m$  model in the (001) plane (a, b) through O1 (a) and M1 (b) atoms and in the (010) plane (c). Lines correspond to positive values of the electron density with  $0.5 e \times \text{\AA}^{-3}$  steps, respectively. The color scale of the residual electron density is shown.

**Annex 1.  $R\bar{3}m$  models tested during the Rietveld refinement of  $K_5Eu(MoO_4)_4$  structure using the SXPD data:**

**i) the original model  $R\bar{3}m$ :** the atomic coordinates of the  $K_2Pb(SO_4)_2$  structure [28-29]. In  $K_2Pb(SO_4)_2$ , cations occupy two crystallographic positions  $M1$  (Pb) and  $M2$  (K). In KEMO, potassium cations occupy the  $M2$  position of the palmierite-type structure, while the  $M1$  positions are statistically occupied by  $K^+$  and  $Eu^{3+}$  ( $M1 = 0.5K^+ + 0.5Eu^{3+}$ ). The anion positions are fully occupied by the  $MoO_4^{2-}$  tetrahedra.

After the refinement of KEMO structure in the  $R\bar{3}m$  model, the isotropic atomic displacement parameters for oxygen atoms O1 (site symmetry  $6c$ ) and O2 (site symmetry  $18m$ ) were  $U_{iso.} = 0.1800(6)$  and  $U_{iso.} = 0.062(2)$ , respectively (Table S3). Fig. S5 shows the  $[\rho_{dif.}(x,y,z)]$  residual electron density maps for KEMO structure after the refinement in the  $R\bar{3}m$  model in the (001) plane through O1 and  $M1$  atoms and in the (010) plane. Residual electron density after refinement is observed around the O1 ( $\sim 2 e \times \text{\AA}^{-3}$ ) and  $M1$  ( $\sim 3.5 e \times \text{\AA}^{-3}$ ) positions. Moreover, residual electron density in the (010) plane is observed in the K2 ( $M2$  site) position ( $\sim 2.5 e \times \text{\AA}^{-3}$ ) and between two  $MoO_4^{2-}$  tetrahedra on the  $3$ -fold axis ( $\sim 2 e \times \text{\AA}^{-3}$ ). In the palmierite-type structure, O1 oxygen atoms as well as  $M1$  and  $M2$  positions lie on the  $3$ -fold axis and the presence of residual density shows that displacement of the O1,  $M1$  and K2 atoms from the  $3$ -fold axis is possible in contrast to the  $\alpha$ - $K_5Yb(MoO_4)_4$  phase [45]. Earlier, a similar displacement of these atoms from the  $3$ -fold axis was found during the structure refinement of  $\alpha$ - $K_5Y(MoO_4)_4$  [46] and  $M_5R(MoO_4)_4$  ( $M = K, Rb; R = Nd, Gd, Bi$ ) single crystals [47].

**ii) the disordered model  $R\bar{3}m$ :** the  $M1$  and O1 atoms are displaced from special positions with site symmetry  $3a$  ( $M1$ ) and  $6c$  (O1) to the special position  $(x, \bar{x}, z; \text{symmetry } 18m)$ . The refinement is characterized by essentially lower values of structural  $R$ -factors, atomic displacement parameters and max/min residual density peaks (Table S3). However, the refinement of the disordered  $R\bar{3}m$  model results in a strong distortion of the  $MoO_4^{2-}$  tetrahedra (O1-Mo-O2 angles in Table S3).

**Table S3.** Crystallographic Data for  $\text{K}_5\text{Eu}(\text{MoO}_4)_4$  in different models

| Space group                                                                                                     | Original $R\bar{3}m$ model  | $R\bar{3}m$ model with <i>M1</i> and <i>O1</i> disorder | primary <i>C2/m</i> model         |
|-----------------------------------------------------------------------------------------------------------------|-----------------------------|---------------------------------------------------------|-----------------------------------|
| Lattice parameters: <i>a</i> (Å)                                                                                | 5.98647(1)                  | 5.98663(1)                                              | 10.37099(5)                       |
| <i>b</i> (Å)                                                                                                    |                             |                                                         | 5.98542(3)                        |
| <i>c</i> (Å)                                                                                                    | 20.72495(5)                 | 20.72517(5)                                             | 7.72496(4)                        |
| $\beta$ (deg.)                                                                                                  |                             |                                                         | 116.5836(5)                       |
| <i>V</i> (Å <sup>3</sup> )                                                                                      | 643.229(2)                  | 643.249(2)                                              | 428.831(4)                        |
| <i>Z</i>                                                                                                        | 1.5                         | 1.5                                                     | 1                                 |
| <b>Refinement</b>                                                                                               |                             |                                                         |                                   |
| No reflections (All / Obs.)                                                                                     | 361/313                     | 361/306                                                 | 452/436                           |
| <i>R</i> and <i>R<sub>w</sub></i> (%) for Bragg reflections ( <i>R<sub>all</sub></i> / <i>R<sub>obs</sub></i> ) | 14.40/12.64 and 15.10/14.99 | 11.18/10.17 and <b>12.98/12.93</b>                      | <b>10.23/9.44</b> and 13.19/13.04 |
| <i>R<sub>p</sub></i> ; <i>R<sub>wp</sub></i> ; <i>R<sub>exp</sub></i>                                           | 3.62, 6.94, 1.24            | 3.48, 6.54, 1.24                                        | <b>3.31, 6.15, 1.14</b>           |
| Goodness of fit (ChiQ)                                                                                          | 5.59                        | 5.27                                                    | 5.38                              |
| Max./min. residual density ( $e \times \text{Å}^{-3}$ )                                                         | 4.10 / -7.22                | 3.29 / -3.92                                            | <b>2.97 / -2.80</b>               |
| <i>U<sub>iso</sub></i> ( <i>O1</i> ) (Å <sup>2</sup> )                                                          | 0.1800(6)                   | 0.032(4)                                                | 0.061(5)                          |
| <i>U<sub>iso</sub></i> ( <i>O2</i> ) (Å <sup>2</sup> )                                                          | 0.062(2)                    | 0.087(2)                                                | 0.071(4)                          |
| <i>U<sub>iso</sub></i> ( <i>O3</i> ) (Å <sup>2</sup> )                                                          |                             |                                                         | 0.035(4)                          |
| <i>U<sub>iso</sub></i> ( <i>M1</i> ) (Å <sup>2</sup> )                                                          | 0.0676(9)                   | 0.027(1)                                                | 0.059(1)                          |
| Mo-O1 distance (Å)                                                                                              | 1.554(11)                   | 1.667(9)                                                | 1.645(13)                         |
| Mo-O2 distance (Å)                                                                                              | 1.656(4)                    | 1.656(4)                                                | 1.691(12)                         |
| Mo-O3 distance (Å)                                                                                              |                             |                                                         | 1.805(16)                         |
| O1-Mo-O2 angle (Å)                                                                                              | 103.67(18)                  | 84.2(3), 114.5(2)                                       | 84.4(4)                           |
| O2-Mo-O2 angle (Å)                                                                                              | 114.59(19)                  | 113.03(17)                                              | 110.0(7)                          |

**Table S4.** Fractional atomic coordinates and isotropic atomic displacement parameters ( $U_{\text{iso}}$ ) for  $\text{K}_5\text{Eu}(\text{MoO}_4)_4$  (SG  $C2/m$ )

| Atom                           | $x$        | $y$        | $z$        | $U_{\text{iso}}*100$ | Occup.         |
|--------------------------------|------------|------------|------------|----------------------|----------------|
| $M1(0.5\text{Eu}+0.5\text{K})$ | 0.0213(9)  | 0          | -0.001(2)  | 3.96(1)              | 0.5 $M1$       |
| K                              | 0.8259(7)  | 0          | 0.4163(6)  | 4.62(17)             | 1 $\text{K}^+$ |
| Mo                             | 0.4014(3)  | 0          | 0.1992(3)  | 3.43(5)              | 1 $\text{Mo}$  |
| O1                             | 0.3721(12) | 0          | 0.9735(16) | 6.3(6)               | 1O             |
| O2                             | -0.001(2)  | 0.2650(16) | 0.2215(10) | 7.1(4)               | 1O             |
| O3                             | 0.2974(13) | 0          | 0.3347(18) | 4.0(4)               | 1O             |

**Table S5.** Selected distances ( $\text{\AA}$ ) and angles ( $^\circ$ ) for  $\text{K}_5\text{Eu}(\text{MoO}_4)_4$  (SG  $C2/m$ )

| Polyhedra                       | Distance               | $d, \text{\AA}$ | Polyhedra        | Distance              | $d, \text{\AA}$ |
|---------------------------------|------------------------|-----------------|------------------|-----------------------|-----------------|
| $M1O_8$                         | $M1-O1 \times 2$       | 3.164(5)        | $\text{KO}_{10}$ | K-O1                  | 2.784(11)       |
|                                 | $M1-O2 \times 2$       | 2.268(15)       |                  | K-O2 $\times 2$       | 3.228(16)       |
|                                 | $M1-O2 \times 2$       | 2.424(17)       |                  | K-O2 $\times 2$       | 3.342(15)       |
|                                 | $M1-O3$                | 2.877(14)       |                  | K-O2 $\times 2$       | 3.015(9)        |
|                                 | $M1-O3$                | 3.154(14)       |                  | K-O3 $\times 2$       | 3.045(2)        |
|                                 | $\langle M1-O \rangle$ | 2.718           |                  | K-O3                  | 2.746(18)       |
| $M1-M1$                         |                        | 0.449(17)       |                  | $\langle K-O \rangle$ | 3.079           |
| Mo1O <sub>4</sub> - tetrahedron |                        |                 |                  |                       |                 |
| Mo                              | O1                     | O2              | O2               | O3                    |                 |
| O1                              | 1.630(13)              | 85.8(4)         | 85.8(4)          | 138.1(6)              |                 |
| O2                              |                        | 1.696(12)       | 112.1(7)         | 115.1(5)              |                 |
| O2                              |                        | 112.1(7)        | 1.696(12)        | 115.1(5)              |                 |
| O3                              |                        |                 |                  | 1.808(17)             |                 |
| $\langle \text{Mo-O} \rangle$   | 1.708                  |                 |                  |                       |                 |

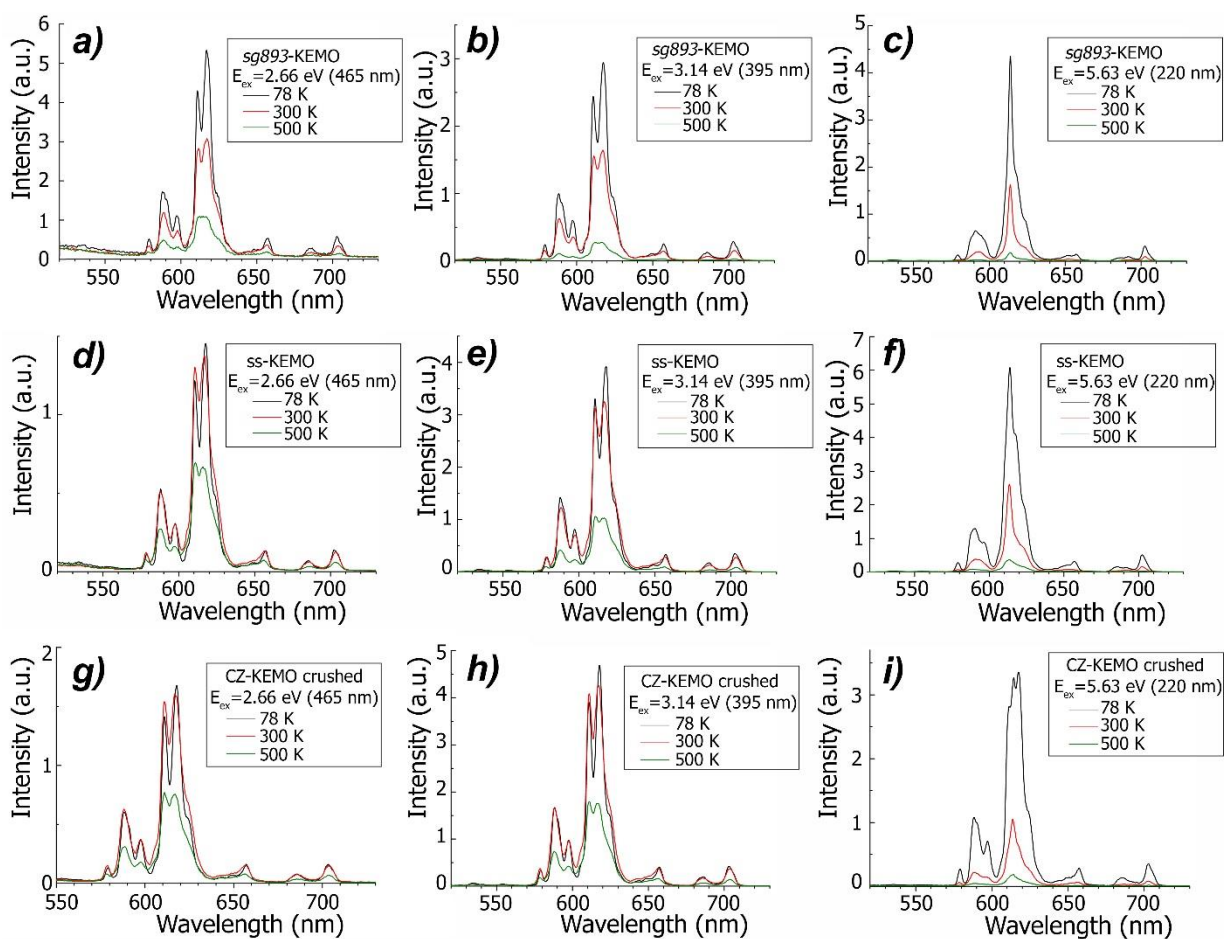

**Figure S5.** Photoluminescence emission spectra at temperatures 78, 300 and 500 K of *sg893*-KEMO (a-c), *ss*-KEMO (d-f) and crushed crystal (g-i) measured at  $E_{ex} = 2.66$  eV (a, d, g); 3.14 eV (b, e, h) and 5.63 eV (c, f, i).



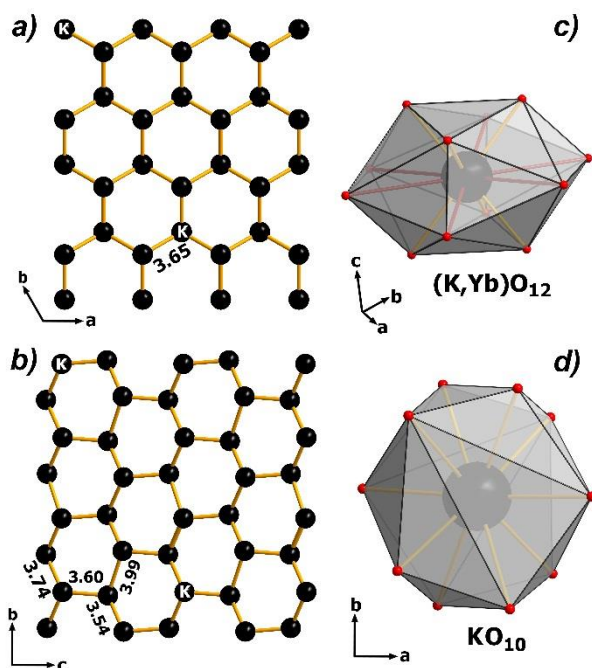

**Figure S6.**  $M2$ -layers ( $a$ ,  $b$ ) and  $K1O_n$  ( $c$ ,  $d$ ) polyhedra in the rhombohedral  $\alpha$ - $K_5Yb(MoO_4)_4$  ( $a$ ,  $c$ ) and monoclinic  $\gamma$ -phase ( $b$ ,  $d$ ).

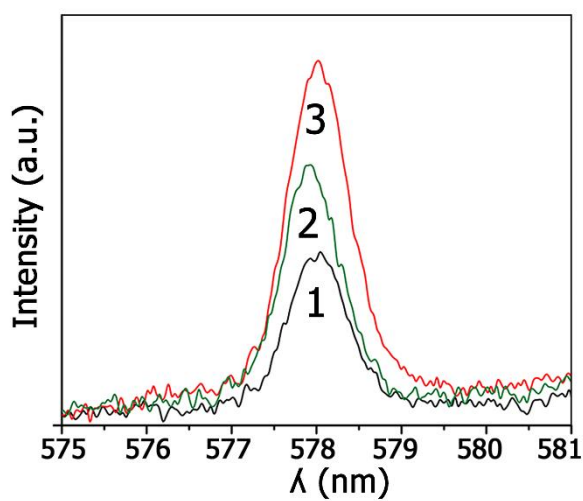

**Figure S7.** Photoluminescence emission spectra for the  $^5D_0 \rightarrow ^7F_0$   $Eu^{3+}$  transition of  $K_5Eu(MoO_4)_4$  at  $T_R$ :  $sg893$ -KEMO (1),  $ss$ -KEMO (2) and crushed crystal (3).

**Table S6.** Positions ( $\lambda_{\max}$ , nm) of the  $^5D_0 \rightarrow ^7F_0$  transition, integral intensities ( $I_{\max}$ , a.u.) of the  $^5D_0 \rightarrow ^7F_1$  and  $^5D_0 \rightarrow ^7F_2$  transitions,  $^5D_0$ - $^7F_2$ / $^5D_0$ - $^7F_1$  ratio (R/O), lifetimes ( $\tau$ , ms) and quantum yield (QY, %) for  $K_5Eu(MoO_4)_4$  prepared by solid state synthesis (*ss*), sol-gel method followed by annealing at 893 K (*sg893*) and the Czochralski (CZ) techniques. All samples are measured under the same conditions.

| Technique    | $^5D_0 \rightarrow ^7F_0$ ,<br>$\lambda_{\max}$ , nm | $^5D_0 \rightarrow ^7F_1$ ,<br>$I_{\max}$ | $^5D_0 \rightarrow ^7F_2$ ,<br>$I_{\max}$ | R/O<br>ratio | $\tau$ , ms     | QY   |
|--------------|------------------------------------------------------|-------------------------------------------|-------------------------------------------|--------------|-----------------|------|
| <i>sg893</i> | 578.0                                                | 23738                                     | 140146                                    | 4.33         | 0.099,<br>1.282 | 33   |
| <i>ss</i>    | 577.9                                                | 33583                                     | 196046                                    | 4.34         | 1.433           | 48   |
| <i>CZ</i>    | 578.0                                                | 54866                                     | 283315                                    | 4.03         | 1.473           | 66.5 |
